## **Novel rabies virus variant for bi-directional optical control reveals modulatory influence of the pulvinar on visual cortex in rat**

Scholl LR<sup>1,a</sup>, Zhang L<sup>2,b</sup>, Foik AT<sup>2,c</sup>, Lyon DC<sup>2,\*</sup>

<sup>1</sup>Department of Anatomy and Neurobiology, School of Medicine, University of California, Irvine

<sup>2</sup>Department of Cognitive Sciences, School of Social Sciences, University of California, Irvine

Current Addresses:

<sup>a</sup>Department of Electrical and Computer Engineering, University of Washington, Seattle, WA 98195

<sup>b</sup>Systems Neurobiology Laboratories - Callaway Lab, Salk Institute for Biological

<sup>c</sup>Studies, 10010 North Torrey Pines Road, La Jolla, CA 92037

International Centre for Translational Eye Research, Warsaw, Poland

**Abbreviated title: Bi-directional optical control**

**\*Corresponding author:**

David C. Lyon

364 Med Surge II

University of California

Irvine, CA 92697-1275

Phone: 949-824-0447

e-mail: [dclyon@uci.edu](mailto:dclyon@uci.edu)

**Number of figures:** 12

**Number of words for Abstract:** 118/250

**Number of words for Significance Statement:** /120

**Number of words for Introduction:** 580/650

**Number of words for Discussion:** 1,047/1,500

**Number of pages:** 37

This work was supported by the National Eye Institute R01EY024890 (DCL) and National Institute of Neurological Disorders and Stroke R21 NS113264.

**Keywords:** GtACR2, Chrimson, optogenetics, neuronal circuits, pulvinar, visual cortex

## **Abstract**

Optogenetic tools have become of great utility in the causal analysis of systems in the brain. However, current optogenetic techniques do not reliably support both excitation and suppression of the same cells in vivo, limiting analysis and slowing research. Here we developed a novel glycoprotein-deleted rabies virus expressing two channelrhodopsin proteins, GtACR2 and Chrimson, in order to independently manipulate excitatory and inhibitory transmembrane potentials, respectively. Using this approach, we demonstrated that rodent pulvinar neurons modulate cortical size tuning and suppress flash responses, but do not drive activity in visual cortex. While our goal was primarily to develop this novel method to study the structure-function organization of thalamocortical circuits, this technique is readily applicable to study any brain region.

Manipulating neural activity is a highly effective way to deduce the role of complex cortical networks on sensory perception and behavior. More crude methods of ablation and lesion have given way to small molecule receptor agonists and electrical microstimulation, and, more recently, to optogenetic proteins that are reversible, do not interfere with the normal physiology of cells, and can quickly and efficiently raise or lower membrane potentials (Deisseroth, 2011; Yizhar et al. 2011; Bernstein et al. 2012; Prigge et al. 2012). These recent optogenetic methods can reach high spatial and temporal resolutions making it possible to dissect cortical network connections and related functions on a fine scale (e.g., Adesnik et al. 2012; Lee et al. 2012; Olsen et al. 2012; Wilson et al. 2012; Xue et al. 2014). Even so, light-sensitive proteins only allow either anions or cations to flow across the neuronal membrane, inducing either depolarization or hyperpolarization, but not both. Introducing a single activating or inhibiting opsin does not provide absolute control over cell activity, making it impossible to drive or suppress downstream activity in all situations due to complex excitatory and inhibitory network structures. In addition, continuous excitation or inhibition can lead to adaptation and reduced efficacy (Lignani et al., 2013), and is impractical over the long-term because the balance between excitation and inhibition that is important for network dynamics (van Vreeswijk & Sompolinsky, 1996) is altered.

One system where these issues are apparent are the projections between the thalamus, in particular the pulvinar, and visual cortex. The pulvinar nucleus, called the lateral posterior nucleus (LP) in rodents, is known to have influence over activity in visual cortex (Saalmann et al., 2012; Tohmi et al., 2014; Zhou et al., 2016), but not much is

known about what information is being transmitted (Roth et al., 2015; Zhou et al., 2017). The pulvinar receives diverse input (see Figure 1), ranging from attention signals from frontal cortex (Romanski et al., 1997; Wilke et al., 2009) to input from multiple sensory cortical areas (Kaas & Lyon, 2007; Kamishina et al., 2009; Juavinett et al., 2019) and superior colliculus (Benevento & Standage, 1983; Takahashi, 1985; Nakamura et al., 2015), to projections from melanopsin-containing retinal ganglion cells (Allen et al., 2016). It is unlikely that a nucleus with such diverse inputs has only one function, or that neurons in the pulvinar all have similar responses to the same stimulus. This makes it difficult to know in advance whether activation or inactivation (or both) of pulvinar neurons will have an effect on cortical systems. Furthermore, projections from the thalamus can target both excitatory and inhibitory subnetworks (Bruno & Sakmann, 2006; Cruikshank et al., 2007), so although thalamocortical projections are typically excitatory in nature (Reid & Alonso, 1995; Gil et al., 1999), the same population of pulvinar cells might have a facilitating drive over one cortical system but an inhibitory drive over another.

Here we introduce a method to retrogradely deliver a pair of independently activated light-gated ion channels, GtACR2 and Chrimson, with selectivity for positively and negatively charged ions, respectively. With this new tool, we probe the inputs to visual cortex from the pulvinar to ask what modulatory effect pulvinar has on visually evoked responses in cortex. Since we can perform both activation and inactivation of projection neurons, we effectively cut experiment times in half, and increase statistical power by

studying a single population. We also demonstrate the effectiveness of the virus by recording local cortical activity in response to multi wavelength laser activation.

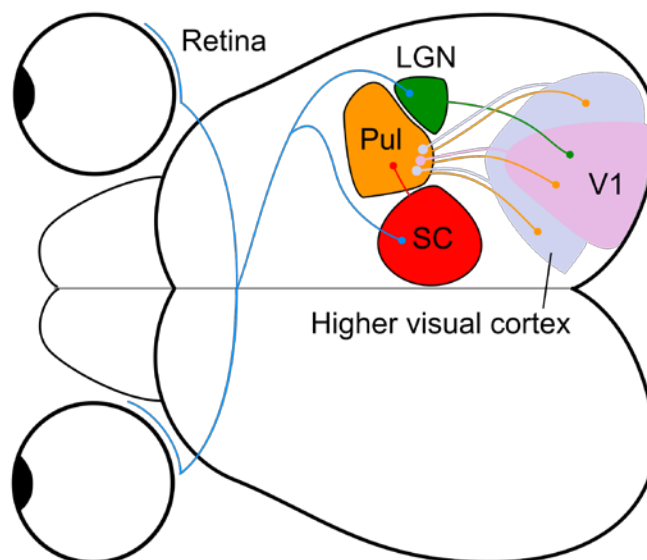

**Figure 1.** Rodent visual system overview. Retinal ganglion cells project to the lateral geniculate nucleus (LGN) and the superior colliculus (SC). Most of the pulvinar (Pul) receives driving input from cortex, including primary (V1) and higher visual cortex, but the caudal part also receives input from SC. Projections from the pulvinar mainly target higher visual cortex, with more sparse connections to V1. Not to scale.

## Materials and Methods

### *Bi-Directional Optical Construct Design*

In order to independently excite and inhibit neurons, we selected two channelrhodopsin proteins with compatible spectral and electrochemical characteristics. These are Chrimson, a fast red-shifted channelrhodopsin variant (Klapoetke et al., 2014; Oda et al., 2018) and GtACR2, a blue-shifted mutant from a class of anion-channelrhodopsins

(Govorunova et al., 2015). It has been demonstrated previously that Chrimson effectively induces cation flow and elicits neural spiking activity, while GtACR2 selectively passes anions and suppresses neural spiking. The combined absorption spectra allows a yellow colored laser around 630 nm to exclusively activate Chrimson but not GtACR2, and a blue colored laser around 450 nm to activate GtACR2, with only residual activation of Chrimson (Figure 2). Critically, this residual activation is overcome by the higher sensitivity of GtACR2 compared to Chrimson, such that with suitable laser power, GtACR2-driven anion flow should dominate. This design is superior to any utilizing light-driven anion pumps, such as halorhodopsin (Halo), due to the millisecond timescale of both channelrhodopsins, and offers greater spectral separation than other approaches, such as between ChR2 and Halo (see Figure 2; Han & Boyden, 2007; Zhang et al., 2007).

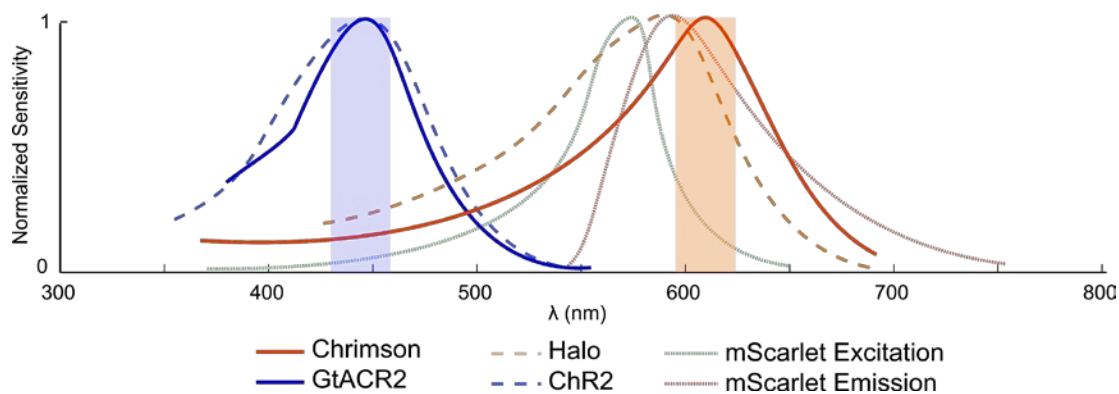

**Figure 2.** Excitation spectra for Chrimson (solid orange; adapted from Klapoetke et al., 2014) and GtACR2 (solid blue; adapted from Govorunova et al., 2015). Halorhodopsin (Halo; dotted orange) and Channelrhodopsin-2 (ChR2; dotted blue) are included for reference (Adapted from Han & Boyden, 2007), as are the excitation and emission spectra for the fluorescent protein mScarlet (dotted green and red lines; adapted from

Bindels et al., 2016). The overlap between GtACR2 and Chrimson excitation spectra is similar to the Halo-ChR2 overlap, which Han & Boyden (2007) have shown to work independently in the same cell.

In order to visualize traced neurons *in vivo* or in histological slides, a fluorescent protein compatible with the two channelrhodopsins' absorption spectrums is needed. We employed the fluorescent protein mScarlet (Bindels et al. 2016); this reporter is suitable not only because of its near-infrared emission spectrum, giving the added benefit of having deep tissue penetration for *in vivo* imaging, but also because it is by far the brightest red fluorescent protein reported (Bindels et al., 2016). Moreover, the excitation spectrum of mScarlet avoids both laser wavelengths selected to activate Chrimson and GtACR2, preventing any unwanted fluorescence during optogenetic manipulation (Figure 2).

To package the effector genes we used glycoprotein-deleted rabies virus (RVdG), which offers several advantages over other methods of gene delivery (Figure 3; Wickersham et al. 2007a; Osakada et al. 2011). When enveloped with rabies glycoprotein or optimized glycoprotein (oG; Kim et al. 2016), RVdG is able to retrogradely trace and deliver genes to the cell body of all pre-synaptically connected neurons, revealing the projections of one brain area to another (e.g., Connolly et al. 2012; Negwer et al. 2017; Foik et al. 2018). In addition, a major benefit of using rabies virus to package channelrhodopsin genes is the ability to pseudotype the virus (Wickersham et al. 2007b) to target specific protein receptors delivered transgenically, via helper viruses, and

through single cell electroporation (Marshall et al. 2010; Wall et al. 2010; Miyamichi et al. 2011; Rancz et al. 2011; Kim et al. 2015; Callaway and Luo, 2015; Wertz et al. 2015; Wall et al., 2016). For example, recently we developed a suite of helper viruses designed to transduce avian tumor virus receptor A (TVA) and oG to excitatory (LV- $\alpha$ CamKII) or inhibitory (AAV-GAD1) subpopulations (Liu et al., 2013; Lean et al., 2019). As such, RVdG pseudotyped with the ASLV-A envelope glycoprotein (EnvA) will selectively infect neurons expressing the TVA receptor, and the oG delivered in trans will enable monosynaptic infection of retrogradely connected neurons.

Several more considerations were made in designing the viral genome. Two measures were taken to reduce the likelihood of interactions between the opins. First, a faster variant of the Chrimson protein, ChrimsonSA (Oda et al., 2018), was chosen due to its reduced sensitivity to light, thus increasing the relative sensitivity of the anion-channelrhodopsin. To further increase this short-wavelength sensitivity, the transgenes were arranged in the genome such that GtACR2 was located near the beginning of the genome, leading to increased transcription efficiency (see Figure 3; Finke et al., 2000; Schnell et al., 2010). Finally, in order to restrict the channelrhodopsins to the cell soma, preventing unwanted axonal activation, both channelrhodopsins were fused with the soma-targeting signal (ST) from the voltage-gated potassium channel Kv2.1 (Lim et al., 2000; Mahn et al., 2018).



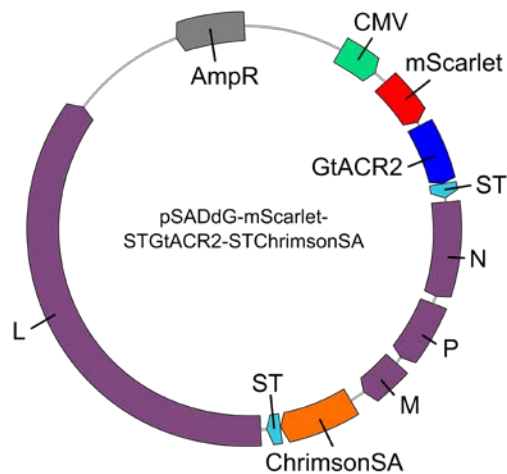

**Figure 3.** Plasmid encoding the modified rabies virus genome. mScarlet and GtACR2 transgenes were cloned immediately following the transcription start sequence with additional M/G intergenic region sequences between each coding region. ChrimsonSA was cloned in place of G. Soma-targeting sequences (ST) were fused to GtACR2 and ChrimsonSA to prevent axonal activation.

### *Virus production*

Virus was prepared following the protocol by Osakada and Callaway (2013) and pseudotyped with oG following Ciabatti et al. (2017). Plasmid synthesis, sequence verification, and maxiprep were performed by Gene Universal Inc (Newark, DE). BHK cells expressing rabies glycoprotein SADB19G (B7GG, provided by the Callaway laboratory) were transfected with the genomic plasmid pSADdG-mScarlet-STGtACR2-STChrimsonSA in addition to plasmids encoding rabies viral proteins N, L, P, and G using Lipofectamine 2000 (Invitrogen, Waltham, MA) transfection reagent. Following transfection, the 100 mm dish was incubated for 6 d at 3% CO<sub>2</sub> and 35°C, then

transferred to a 150 mm dish and incubated for a further 6 d before the supernatant was removed and passed through a 0.45  $\mu\text{m}$  polyethersulfone filter.

BHK cells expressing optimized rabies glycoprotein (TGoG, provided by the Tripodi laboratory) were infected with 5 ml of viral supernatant and maintained at 3% CO<sub>2</sub> and 35°C for 1 d, then washed thoroughly and transferred to a clean dish for another 5-6 d to produce viral supernatant with only oG coated virus. This supernatant was subsequently used to infect five 150 mm dishes of the same cell line in order to amplify the virus. Supernatant was collected twice during incubation at 3% CO<sub>2</sub> and 35°C after 6 and 10 days, then filtered and transferred to an ultracentrifuge (rotor SW28, Beckman Coulter) for 2 h at 19,400 g and 4°C. Purified virus was resuspended in phosphate buffered saline for 1 h at 4°C before 2% fetal bovine serum was added. Aliquots for injection were stored at -80°C. Titer was assessed by infecting HEK 293T cells (Sigma-Aldrich) with serial dilutions of modified virus, to ensure at least  $\sim 1 \times 10^9$  infectious units / mL was achieved. Figure 4 shows infected 293T cells during titration.

### *Electrophysiology*

Injections of modified rabies virus were carried out in four adult female Long-Evans rats. All procedures were approved by the University of California, Irvine Institutional Animal Care and Use Committee and the Institutional Biosafety Committee, and followed the guidelines of the National Institutes of Health. Prior to surgery, rats were initially anesthetized with 2% isoflurane in a mixture of 30% oxygen and 70% nitrous oxide, and maintained with 1 to 1.5% isoflurane in the same mixture. Using a stereotaxic

apparatus, a craniotomy was performed to expose the caudal neocortex of one hemisphere. A glass micropipette was cut to approximately 20  $\mu\text{m}$  diameter, filled with rabies virus suspension, and lowered into the brain using a motorized microdrive. Multiple injections (spaced  $\sim 1$  mm) of rabies virus were made at several depths ranging from 200 to 1600  $\mu\text{m}$ . Following a 6-7 d survival period to allow for infection and expression of transgenes, an eight-channel linear probe (U-probe; Plexon, Dallas, TX) was lowered into the injected site guided by in vivo fluorescent imaging, and a 100  $\mu\text{m}$  diameter optic fiber was positioned at the surface of the injection site for cortical activation or at the apex of lateral posterior nucleus for thalamic activation (stereotaxic coordinates -4 mm from bregma, 1.75 to 2.75 mm lateral). Extracellular recordings were made with and without laser stimulation, with power ranging from 5 to 15 mW at the fiber tip. Light was delivered via the optic fiber to the brain using two diode lasers housed in a beam combiner (Omicron, Dudenhofen, Germany) coupled to the optic fiber. One 594 nm yellow laser (Mambo; Cobolt, Stockholm, Sweden) and one 473 nm blue laser (LuxX 473; Omicron) were triggered using the parallel port and synchronized within 10 ms of visual stimuli onset.

Multichannel recordings were acquired using a 32-channel Scout recording system (Ripple, UT, USA). Local field potentials (LFP) were captured at 1 kHz sampling frequency from signals filtered between 0.3 to 250 Hz and with 60 Hz noise removed. Signals containing spikes were bandpass filtered from 500 Hz to 7 kHz and stored at 30 kHz sampling frequency. Spikes were sorted online in Trellis software (Ripple, UT, USA) while performing visual stimulation. For LFP recordings, only electrodes more

than 250  $\mu\text{m}$  apart were considered for analysis (Katzner et al., 2009). Visual stimuli were generated in Experica (<http://experica.github.io>) and displayed on a gamma-corrected LCD monitor (55 inches, 60 Hz; RCA, New York, NY) at 1920x1080 pixels resolution and 52  $\text{cd}/\text{m}^2$  mean luminance. Stimulus onset times were corrected for LCD monitor response time using a photodiode and microcontroller. Visually responsive cells were found using either 100% contrast drifting grating stimuli or brief (500 ms) flashes of white on a black background.

### *Histology*

Following several recording sessions, but no more than 12 d post injection, rats were deeply anesthetized with Euthasol and transcardially perfused first with saline, then with 4% paraformaldehyde in phosphate buffered saline. Brains were removed and cryoprotected in 30% sucrose for at least 24 hours, then sectioned coronally on a freezing microtome to 40  $\mu\text{m}$  thickness and mounted on glass microscope slides in polyvinyl alcohol mounting medium with 1,4-diazabicyclo-octane (PVA-DABCO, prepared in-house).

Sections were scanned using a fluorescent microscope (Axioplan 2; Zeiss, White Plains, NY) equipped with a 10x objective and motorized stage. Images were captured with a monochromatic low-noise CCD camera (Sensicam qe, PCO AG, Kelheim, Germany) and corrected for lamp misalignment by dividing each pixel by corresponding pixels in a flat field image acquired for each color channel. Corrected images were stitched using stage coordinates with regions of 10 overlapping pixels between images

in which average pixel values were used. Neurons were identified based on the presence of the cell soma and dendrites. Fluorescently labeled neurons were then annotated by anatomical brain region based on the rat brain atlas by Paxinos and Watson (2013). Image correction and stitching were performed in MATLAB using the multisection-imager toolbox (<http://github.com/leoscholl/multisection-imager>).

### *Data analysis and statistics*

Visually evoked potentials (VEP) were averaged across 50 trials for laser and flash stimuli. Peri-stimulus time histograms (PSTH) were constructed using 20 ms bin widths and averaged across 50 trials for laser and flash stimuli. Mean firing rate (MFR) was calculated for spikes in the first 200 ms following stimulus presentation. Average data are presented as mean  $\pm$  standard error of the mean (SEM) unless otherwise noted. Values of  $p \leq 0.05$  were considered significant for Wilcoxon signed rank tests.

## **Results**

The genomic plasmid pSADdG-mScarlet-STGtACR2-STChrimsonSA was successfully synthesized and its sequence verified before virus production. Following transfection, the virus was pseudotyped with optimized glycoprotein (oG) in order to increase infection efficiency (Kim et al. 2016) and titer was verified in the 293T cell line (Figure 4a). The virus was injected into V2, revealing bright *in vivo* (Figure 4b) and *ex vivo*

(Figure 4c) mScarlet fluorescence. Retrogradely labeled cells were visible not only locally near the injection site (Figure 4c) but also in the thalamus (Figure 4d), in particular the lateral posterior nucleus (LP).

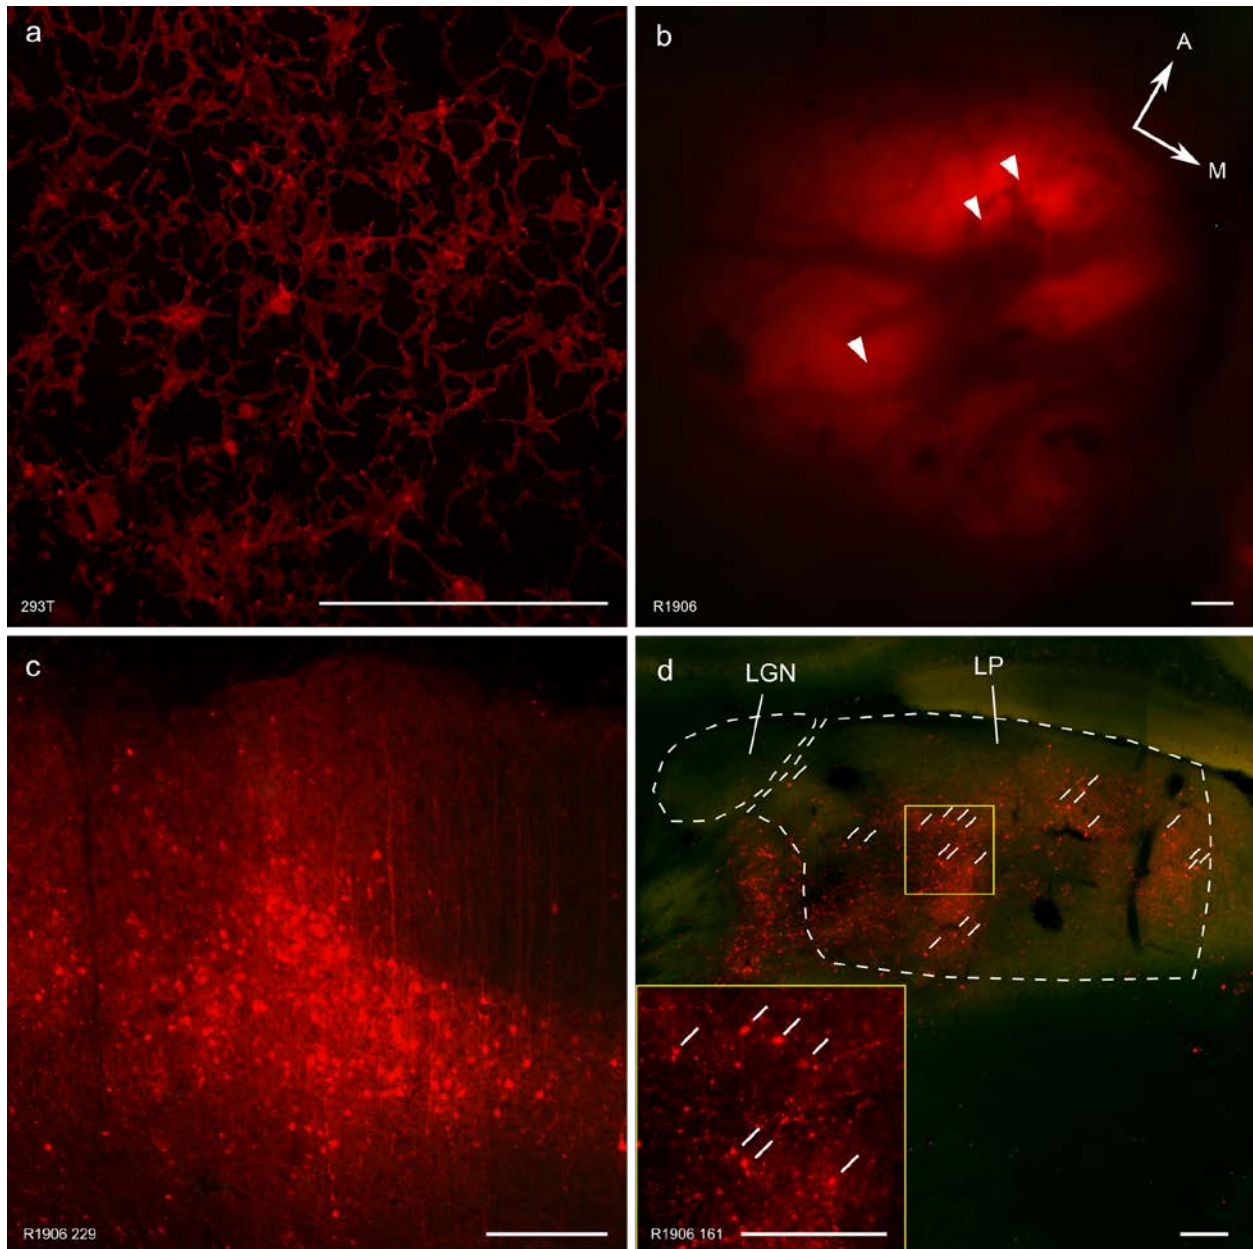

**Figure 4.** mScarlet fluorescence in cultured cells and rat neurons. (a) Infected 293T cells, (b) *in vivo* fluorescence one week after cortical injections (arrowheads), and the

same case *ex vivo* with labeled neurons in cortex (c) and in LP (d). Scale bars equal 250  $\mu\text{m}$

Extracellular cortical recordings in V2 were made *in vivo* during simultaneous local laser manipulation (Figure 5). Single units recorded near the injection site were excited by 5 Hz yellow laser stimulation at the brain surface and suppressed by 5 Hz blue laser stimulation (Figure 6), and were reliably excitable at and above 10 Hz laser stimulation (square wave, 50% duty cycle; Figures 6 and 7).

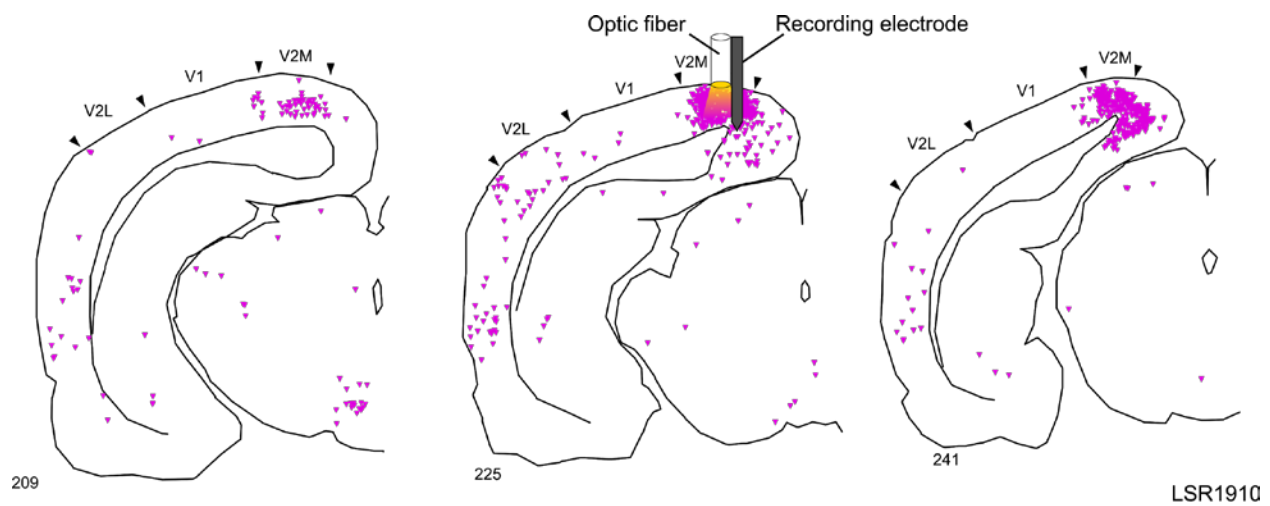

**Figure 5.** Local V2 neurons targeted for optical manipulation. Reconstruction of case LSR1910 in which mScarlet-STGtACR2-STChrimsonSA rabies virus was injected into medial visual cortex where subsequent recordings and laser activation were performed. Scale bar equals 1 mm.



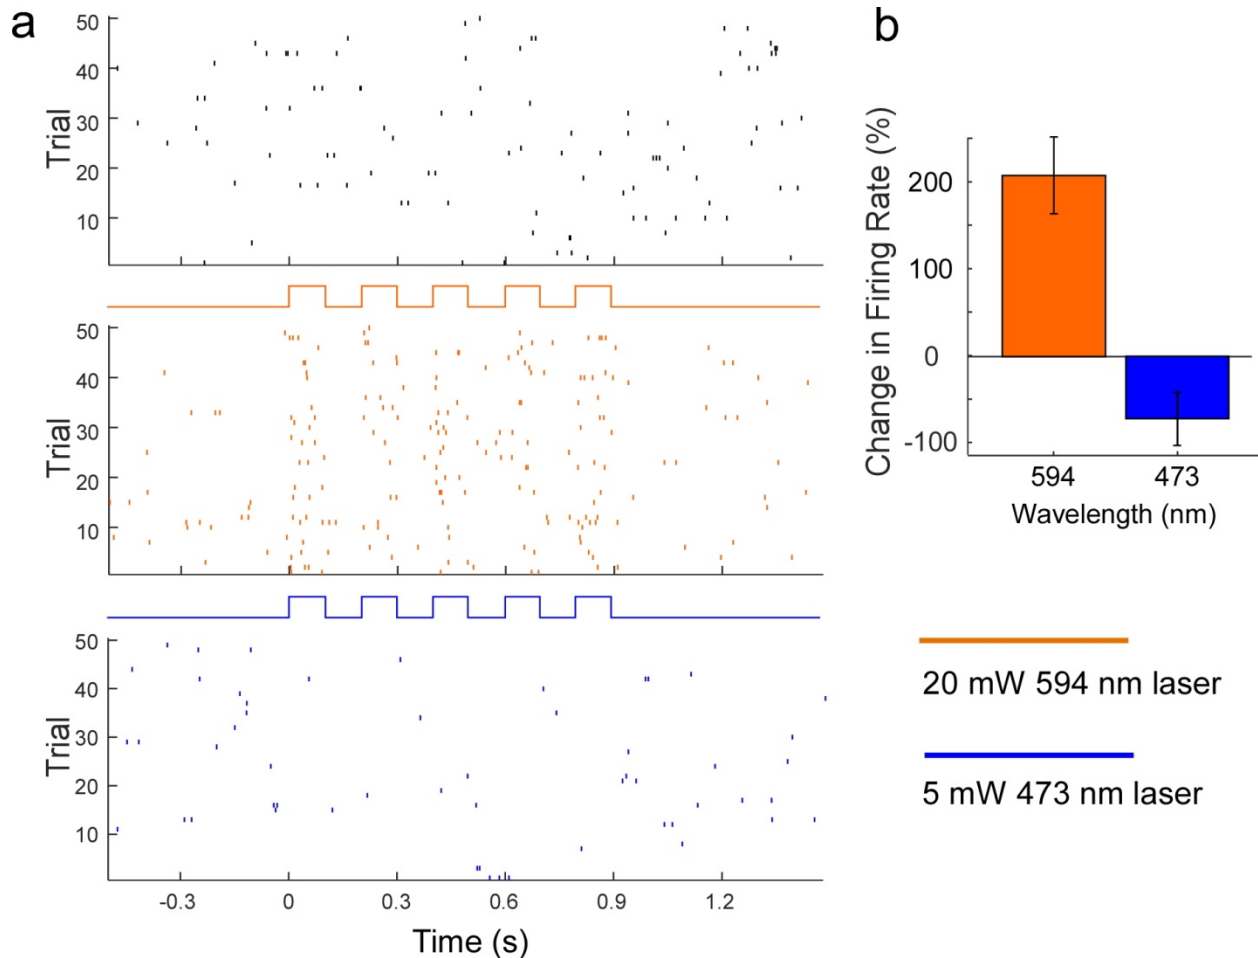

**Figure 6.** Cortical excitation with 594 nm and inhibition with 473 nm wavelength lasers with no visual stimulus. The firing rate of this cell is elevated over 200% under yellow laser light at 20 mW, and decreased by 75% under blue laser light at 5mW. (a) Raster plots of each laser condition. Black marks indicate spikes during trials with no laser stimulation, yellow marks indicate spikes during yellow laser stimulation at 5 Hz, and blue marks indicate spikes during blue laser stimulation at 5 Hz. (b) Summary of the percent change in firing rate from baseline (no laser) to yellow (594 nm) or blue (473 nm) laser excitation.



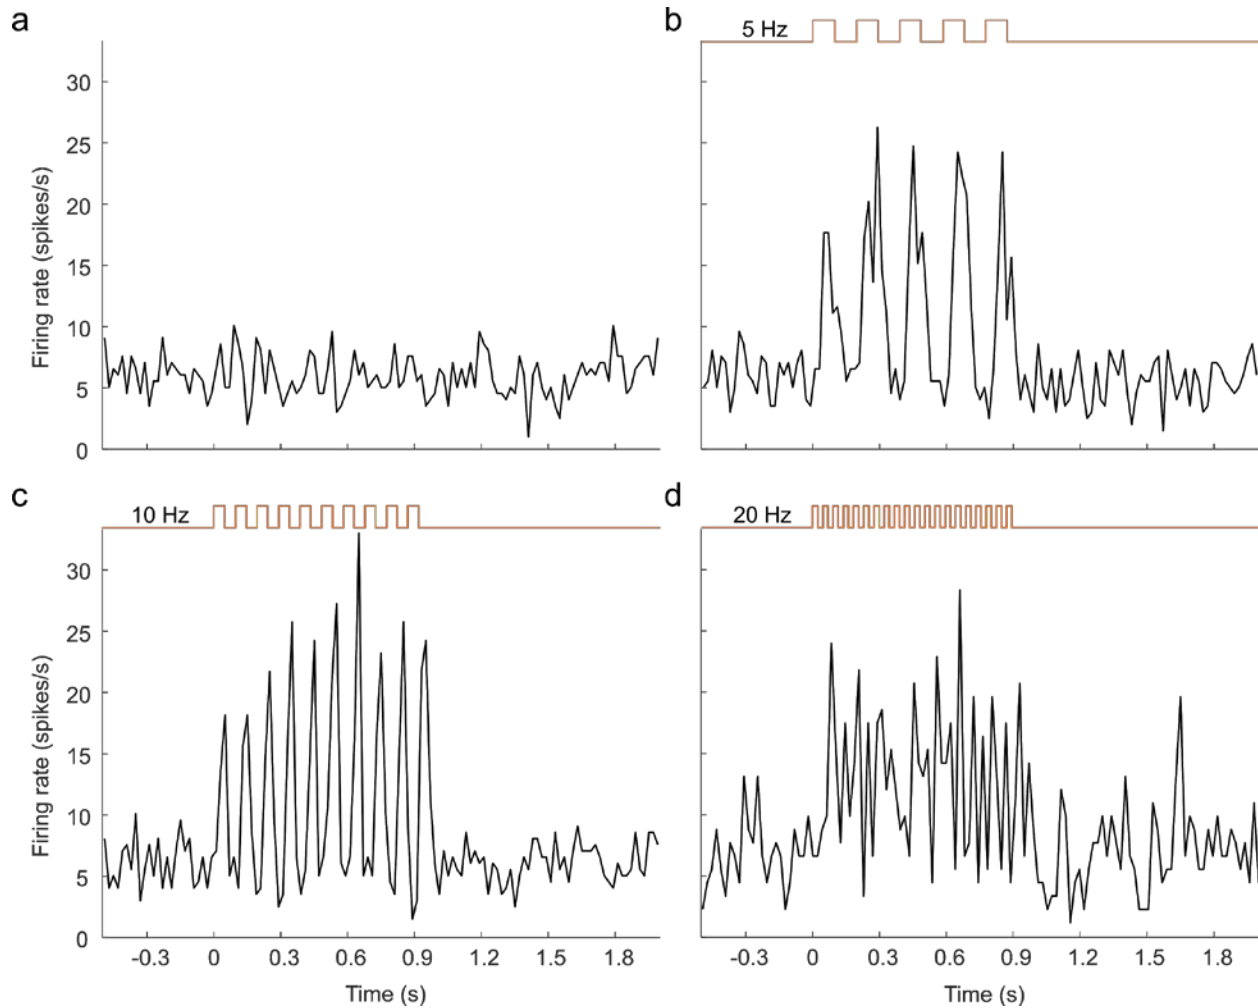

**Figure 7.** Excitation caused by 594 nm wavelength laser in cortical cells. Peri-stimulus time histogram with no laser activation (a), 5 Hz (b), 10 Hz (c), and 20 Hz (d) square wave laser stimulation. The cell response follows the laser pulses at 5 and 10 Hz, but breaks down at 20 Hz although the firing rate is still elevated above baseline. 20 mW at fiber tip.

To test the effectiveness of our virus in manipulating long-range connections, and to explore the causal effects of pulvinar activation and inhibition on cortical activity, we tested cortical responses to visual stimuli during laser manipulation of LP (Figures 8 and 9). Local field potential (LFP) and spiking activity were recorded during presentation of flash stimuli over six cortical penetrations and LP optic fiber sites. Visually evoked potentials (VEP) and mean firing rates (MFR) were measured in response to the onset of a white screen following periods of black (Figures 10 and 11). Offset responses were also recorded but not considered for analysis since typical VEPs and MFR were much larger at the stimulus onset (data not shown).

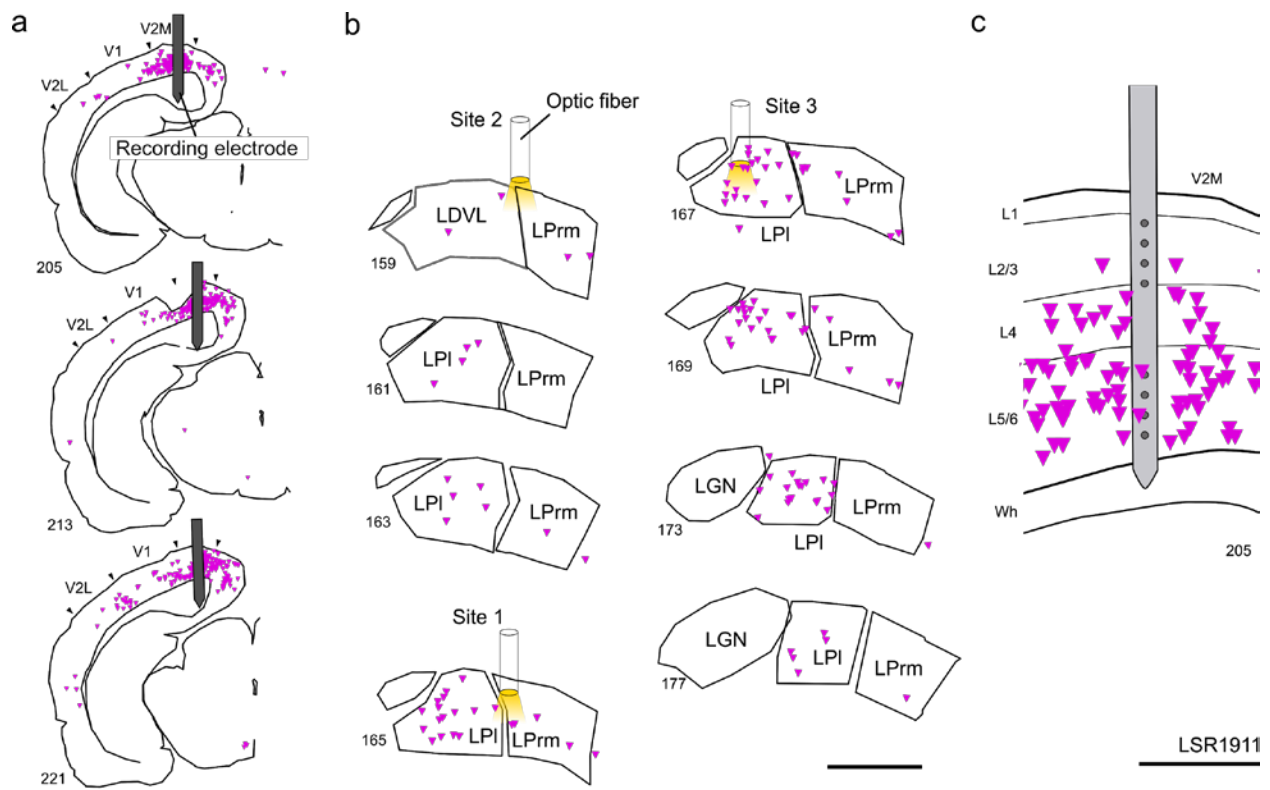

Figure 8. Recording from medial V2 neurons while optically manipulating pulvinar input. Reconstruction of case LSR1911. mScarlet-STGtACR2-STChrimsonSA rabies virus was injected into medial V2 (V2M; panel a) and retrogradely infected cells in LPI and LPcm (b). Recordings were made across several cortical layers at the injection site (c) while simultaneously activating or inhibiting cells in LP with 594 nm and 473 nm wavelength laser light in order to uncover thalamocortical modulation of activity in V2M. Three sites were targeted sequentially in LP. Site 1 targeted central LP, Site 2 targeted anterior LP, and Site 3 targeted LPI only. Scale bars in (a) and (b) equal 1 mm; scale bar in (c) equals 0.5 mm.

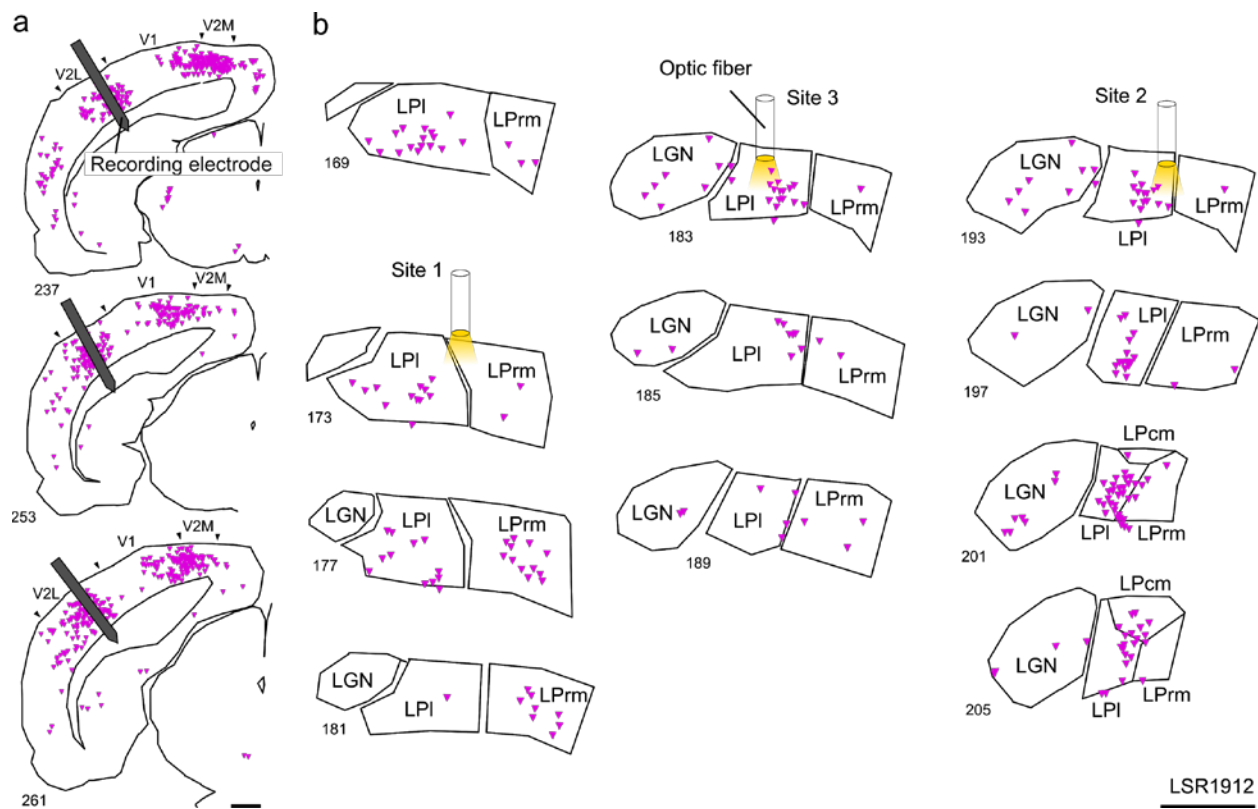

Figure 9. Recording from lateral V2 neurons while optically manipulating pulvinar input. Reconstruction of case LSR1912. Virus was injected into lateral V2 (V2L, panel a), retrogradely infecting neurons in LPI, LP<sub>rm</sub>, and LP<sub>cm</sub> (b). An optic fiber was lowered sequentially into three sites targeting LPI during extracellular recordings of cells in V2L. Scale bars equal 1 mm.

At several V2 recording sites, changes in VEP amplitude were immediately noticeable following both activation (594 nm laser) and inactivation (473 nm laser) of pulvinar neurons (Figure 10a, 10c). In these channels, activation of pulvinar lowered evoked amplitude, whereas inactivation raised amplitude. Other recording sites showed signs of amplitude change in one direction but not the other as shown in Figure 10b, in which inactivation (blue laser) caused increased amplitude whereas activation caused no change. Importantly, no channels showed amplitude increase following pulvinar activation or amplitude decrease following pulvinar inactivation.

On average, amplitude in response to stimulus onset was significantly lower during periods of LP activation (594 nm laser) compared to baseline (Figure 10e-f;  $n = 20$ ,  $p = 0.025$ , Wilcoxon sign test), and significantly higher for periods of LP inactivation (473 nm wavelength laser) compared to baseline ( $p = 0.0008$ , Wilcoxon sign test).

Comparing the two laser wavelengths directly, there was a significantly higher amplitude for 473 nm wavelength light than for 594 nm wavelength light ( $p = 0.0002$ , Wilcoxon sign test). Without any visual stimulus, neither laser wavelength caused significant changes to amplitude.

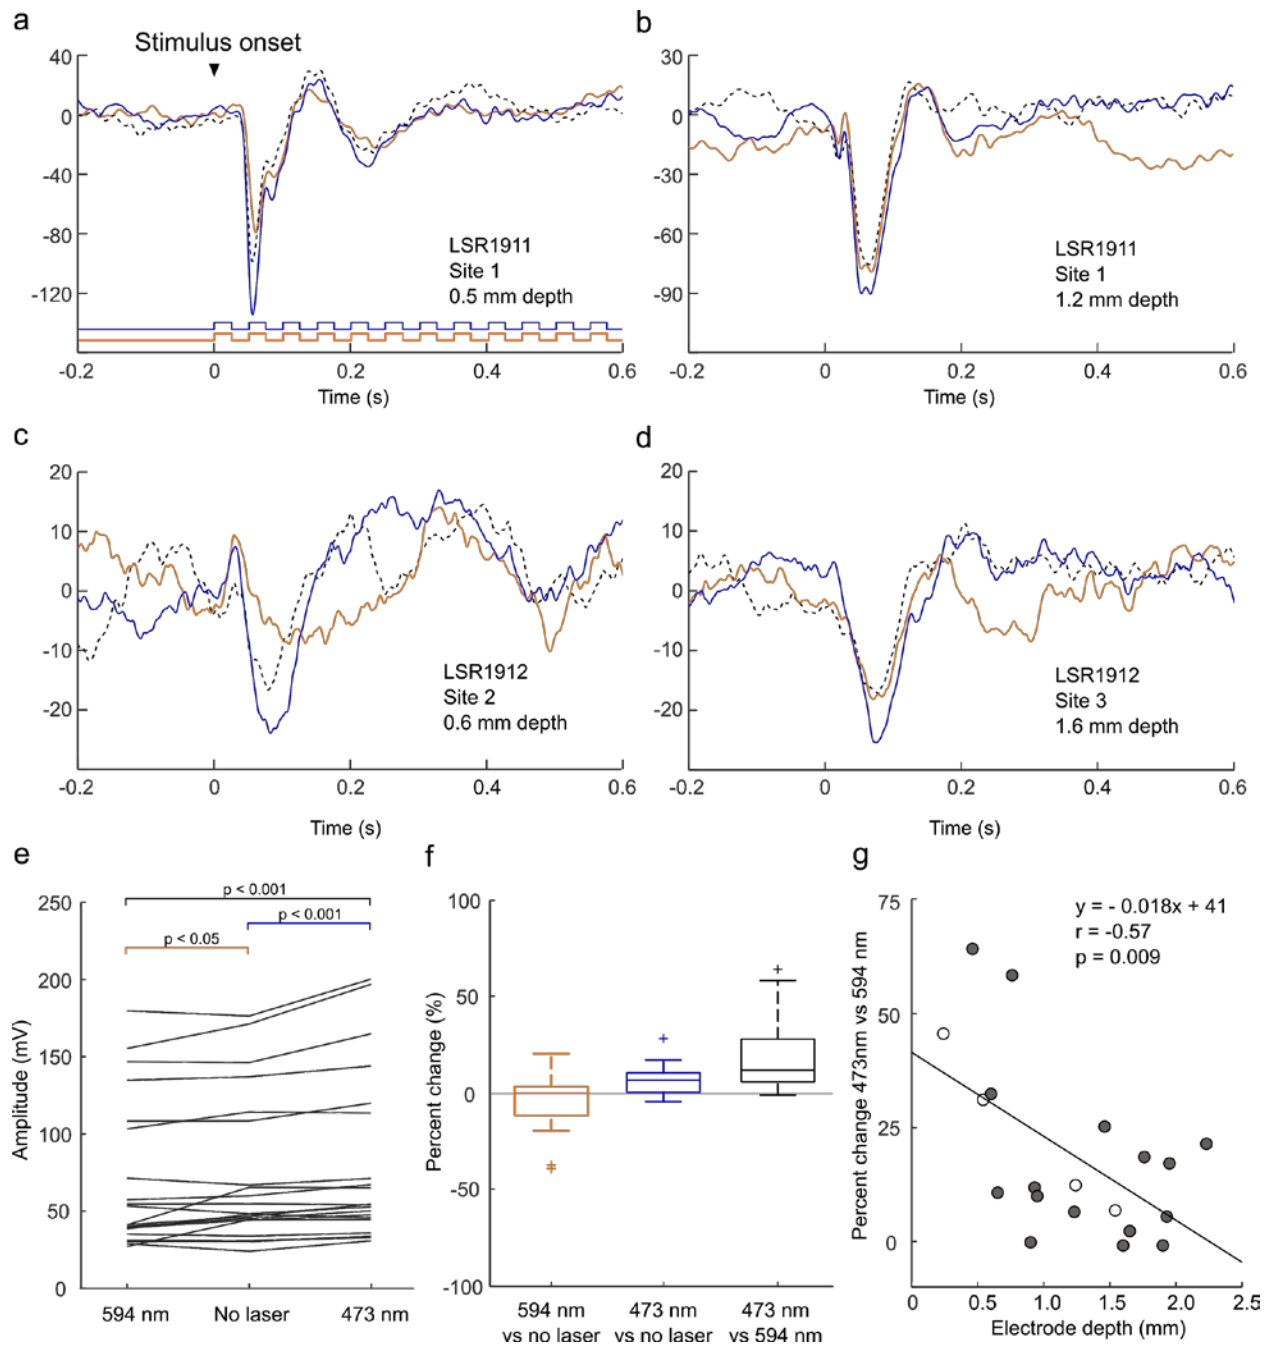

Figure 10. Visually evoked potentials (VEP) in V2 during pulvinal manipulation of mScarlet-STGtACR2-STChrimsonSA rabies virus infected cells. (a-d) Examples of VEP during no laser (dotted lines), yellow laser (orange lines) or blue laser (blue lines) stimulation of LP. (e) Population amplitude of VEPs in V2 when LP neurons were

activated by yellow (594 nm) laser, when no laser was used, and when LP neurons were suppressed by blue (473 nm) laser. Evoked responses in V2 are strongest when LP neurons are inactivated and weakest when LP neurons are activated. (f) Percent change between activation, suppression, and no laser conditions. (g) Comparison of electrode depth and percent change between suppression and activation of LP neurons. Sites recorded in V2L are shaded; sites recorded in V2M are open circles. Solid line indicates a significant linear correlation between electrode depth and strength LP manipulation had on cells in V2 at that depth.

The difference in amplitude between the two laser wavelengths essentially measured the strength LP manipulation had on a particular cortical recording site. We compared this manipulation strength against electrode depth to identify which cortical layers were most affected by pulvinar. Recording sites in superficial cortical layers were the most strongly manipulated. Across the whole population, electrode depth was negatively correlated with change in amplitude between the two laser wavelengths (Pearson's  $r = -0.57$ ,  $p = 0.009$ ; see Figure 10g).

Cortical single unit responses to the same stimuli were also affected by pulvinar manipulation. Three V2 neuron examples are shown in Figure 11a-c. Firing rates were significantly lower on average during pulvinar activation compared to without modulation (Figure 11d-e;  $n = 28$ ,  $p = 0.013$ ; Wilcoxon sign test), and significantly higher during pulvinar inactivation (473 nm laser) versus pulvinar activation (594 nm;  $p = 0.030$ ;

Wilcoxon sign test). Cortical electrode depth was also significantly correlated with firing rate change (Pearson's  $r = -0.35$ ,  $p = 0.05$ ).

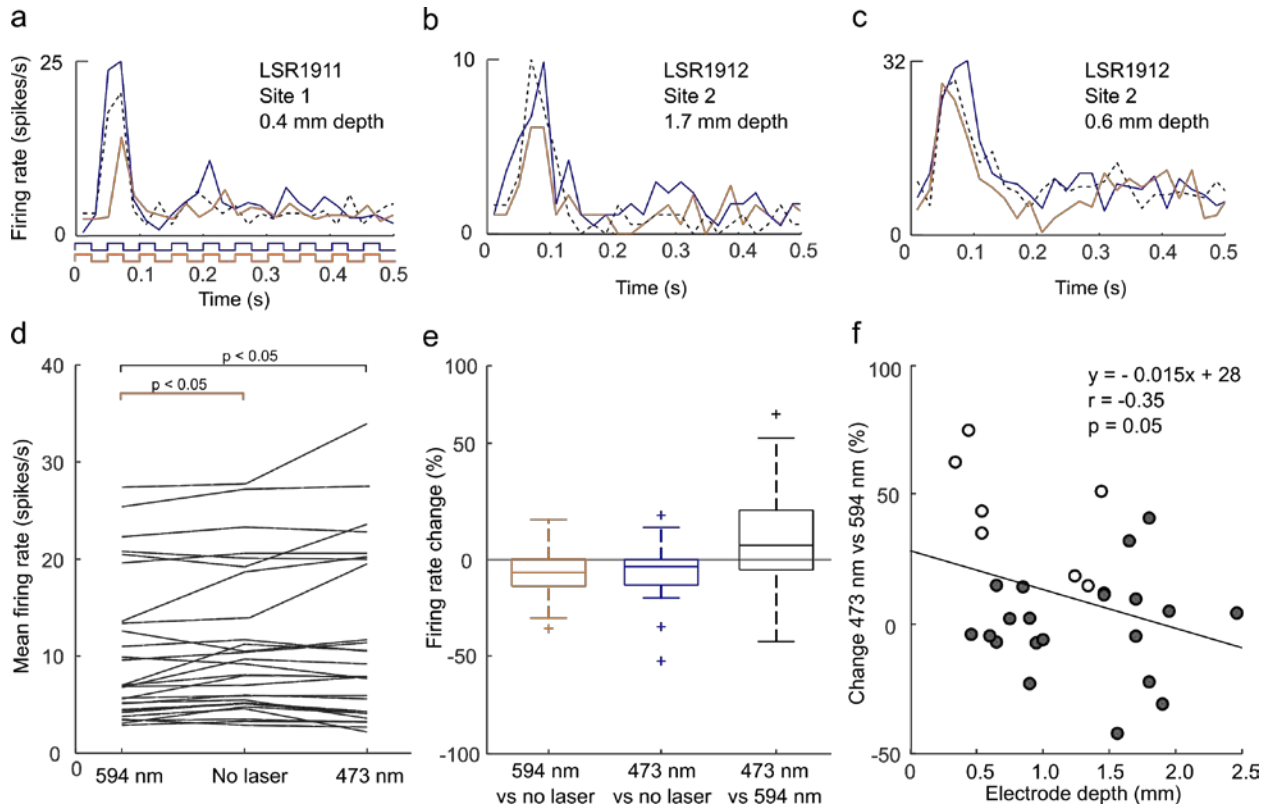

Figure 11. Single unit responses to flash stimulus with and without laser manipulation of pulvinar. (a-c) Three example cells with varying degrees of modulation from pulvinar.

Colors indicate which laser manipulation was used, while dotted lines indicate no

manipulation was used. (d) Population response during pulvinar stimulation with yellow

laser (594 nm), no laser, or blue laser (473 nm) light. (e) Percent change over no laser

condition for yellow and blue lasers, and percent change from yellow laser to blue laser

conditions. (f) Comparison of electrode depth to percent change in firing rate between

blue laser and yellow laser. Open circles indicate units were recorded from V2M while

shaded circles indicate units were recorded from V2L.

Cells in V2 were also tested for responses to sinusoidal drifting grating stimuli at different spatial frequencies, temporal frequencies, orientations, and sizes. A subset of these cells ( $n = 8$ ) were tested for size preference during laser stimulation of pulvinar. These cells were highly selective to the diameter of the stimulus, with optimal responses at sizes ranging from  $18^\circ$  to  $40^\circ$  ( $M = 26 \pm 7^\circ$ ) and maximally suppressed at a size ranging from  $50^\circ$  to  $80^\circ$  ( $M = 63 \pm 12^\circ$ ).

As shown by the example cells (Figure 12 A and B), mean V2 cell firing rates at the optimal diameter were significantly lower when pulvinar was inactivated (473 nm laser) than without pulvinar modulation ( $p = 0.016$ ; Wilcoxon sign test; Figure 12c). No significant change in firing rate at the optimal size was observed during pulvinar activation (594 nm laser). In contrast, at the maximally suppressed size, cells in V2 were more clearly affected by pulvinar activation than inactivation (see example in Figure 12a). On average, firing rates at the suppressed size increased significantly during pulvinar activation (594 nm laser;  $p = 0.016$ ; Wilcoxon sign test). No significant change in firing rate at the suppressed size occurred during pulvinar inactivation (473



nm laser).

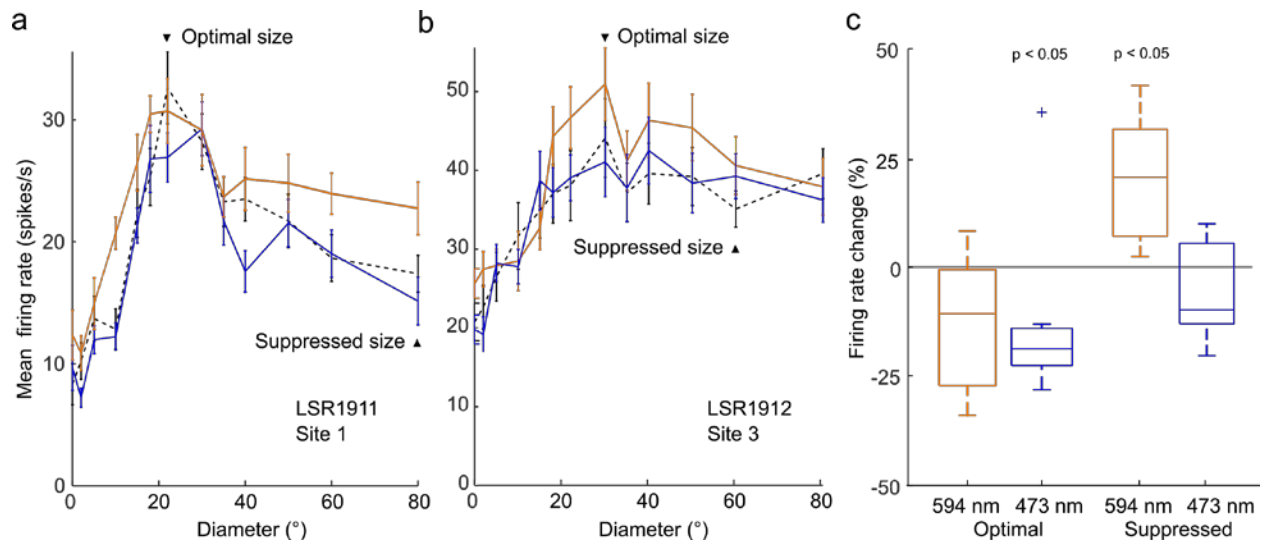

Figure 12. Changes in cortical size tuning due to optical manipulation of pulvinar. Two examples of size tuned cells in rat V2, one with decreased firing rate at optimal size (20°) due to pulvinar inactivation and increase firing rate at the maximally suppressed size (80°) due to pulvinar inactivation (a), and one with increased firing rate at optimal size due to pulvinar excitation (b). Population medians and quartiles of percent change at the optimal diameter (c) show that inactivation of pulvinar consistently decreased firing rate.

## Discussion

Here we demonstrated bi-directional optical control over populations of cortical and thalamic neurons using a modified rabies virus. To our knowledge it is the first use of two channelrhodopsins delivered in a single virus, and also the first use of the fluorescent protein mScarlet in a rabies virus vector. Using this virus we showed that

pulvinar neurons suppress activity in higher visual cortex in the rat during flash stimulus presentation, and that pulvinar has influence over cortical size tuning. The virus was also very bright and filled whole cells in histology (see Figure 4), giving it potential use for neuron tracing experiments.

Overall, our method of dual opsin delivery is extremely efficient, utilizing the best currently available light-sensitive ion channels, fluorescent protein, and optimized rabies virus vector. Previous attempts to deliver bimodal opsins *in vivo* using separate lentiviral vectors (Zhang et al., 2007), or transgenic animals (Yizhar et al., 2011) have not been able to target the same population of cells with both transgenes. Our method using a rabies virus vector, however, is capable not only of simultaneous expression of both opsins in all infected cells, but also of selectively infecting populations of projection neurons to the injection site without the need for transgenic animals (Ghanem & Conzelmann, 2016). An alternative approach is to perform separate experiments using two or more optogenetic approaches, but again this limits analysis to separate populations of neurons and slows research due to the increased requirement for animals and surgical procedures.

Several improvements to the virus could be beneficial. First, the relationship between laser power and change in firing rate has not fully been quantified. We simply used the maximum available yellow laser power and 25% maximum available blue laser power after our initial tests showed that this was a suitable combination in most cases. However, we are uncertain whether interactions between the opsins could be

diminishing the potential efficiency of either protein. Further testing, preferably *in vitro* using patch clamped cells and direct laser activation and inactivation, may be needed to maximize the performance of the virus. Second, although useful for filling whole cells and visualizing cells *in vivo*, the fluorescence in axons is so bright that finding cell bodies can be challenging (see Figure 4). One potential solution is to fuse the fluorescent protein mScarlet to one or both of the channelrhodopsins, limiting fluorescence to the cell soma at the membrane. This is currently being pursued in our lab for applications that require precise cell counts but do not need bright *in vivo* fluorescence.

Pulvinar inactivation has been studied in the past by methods other than what we described here. For example, superior colliculus lesions in mice cause changes to speed tuning across multiple cortical areas (Tohmi et al., 2014). However these changes are hard to attribute to the pulvinar since superior colliculus projects to the lateral geniculate nucleus and other thalamic nuclei (Partlow, et al., 1977; Pasquier & Villar, 1982). Pulvinar inactivation by GABA receptor agonist injections drastically lowered cortical firing rates in monkeys (Purushothaman et al., 2012; Zhou et al., 2016), but such injections cause major changes to thalamic physiology, as well as potentially causing damage to cortex (Lomber, 1999; Majchrzak & Di Scala, 2000). Other nondestructive methods have also been used to correlate task-dependent activity in the pulvinar to activity in cortical areas (Saalmann et al., 2012), but these lack causal inference. Our method of optically manipulating smaller, targeted networks of cells

shows that pulvinar can both increase and decrease firing rates in response to visual stimuli.

Pulvinar activation and inactivation had different effects on different systems, further illustrating the need for bi-directional control of membrane potentials. During flash stimulus presentation, activation of pulvinocortical projections caused decreased evoked potential amplitudes and firing rates, yet size tuned cells were facilitated at large diameters by pulvinar activation. Pulvinar projections to cortex do synapse with multiple cortical layers in rats (Nakamura et al., 2015), so perhaps the effects we saw are mediated by different laminar networks in the cortex, one inhibitory and one excitatory.

We did observe laminar specificity of flash modulation, as the effect of pulvinar manipulation was greatest in superficial layer cortical cells (see Figures 10g and 11f), suggesting that the pulvinar modulates feedforward projections (Felleman & Van Essen, 1991; D'Souza & Burkhalter, 2017). At least for simple flash stimuli, pulvinar neurons might be amplifying responses traveling through hierarchical cortical areas to stimuli inside their receptive fields. It would be interesting to see if layer-specific modulation occurs for more complex stimuli, or during behavioral tasks in awake animals; neurons in the dorsomedial primate pulvinar that are enhanced during covert attention (Petersen et al., 1985) might modulate responses in cortex without the need for optogenetic manipulation.

The experiments here targeted mainly the lateral portion of LP, because in our initial injections most of the projections to V2 originated from the lateral subdivision (see Figure 4d). However, all of the three rodent pulvinar subdivisions send projections to visual cortex, although each has a distinct pattern of connectivity (Nakamura et al., 2015). Differences between the subdivisions could lead to functional differences as well. For example, the caudal portion of the pulvinar receives superior colliculus input while the rostromedial portion does not (Takahashi, 1985), and activity in the caudal pulvinar in mice is dependent on superior colliculus while activity in rostral pulvinar is dependent on cortex (Bennett et al., 2019). To test whether or not neurons each subdivision have similar effects on visual cortex, future experiments could simply place the optic fiber carefully in each subdivision otherwise using the same experimental paradigms shown here.

Cortical areas may also receive differential projections from the pulvinar. We made injections into both medial and lateral portions of V2, expecting differences in projection strength or cortical modulation by pulvinar neurons. However, in our tests, roughly the same number of neurons were found to project to both V2 areas, consistent with previous work (Nakamura et al., 2015), and the effects of optical control over pulvinar neurons were consistent across V2M and V2L (see Figures 10g and 11f).

Specializations within rodent V2 (Tohmi et al., 2014; Nishio et al., 2018) and of projections between pulvinar and V2 (Juavinett et al., 2019) suggest that the pulvinar supports multiple channels of transthalamic computation; further research in this area is warranted.

## References

Allen, A. E., Procyk, C. A., Howarth, M., Walmsley, L., & Brown, T. M. (2016). Visual input to the mouse lateral posterior and posterior thalamic nuclei: photoreceptive origins and retinotopic order. *The Journal of Physiology*, 594(7), 1911–1929. <https://doi.org/10.1113/JP271707>

Benevento, L. A., & Standage, G. P. (1983). The organization of projections of the retinorecipient and nonretinorecipient nuclei of the pretectal complex and layers of the superior colliculus to the lateral pulvinar and medial pulvinar in the macaque monkey. *Journal of Comparative Neurology*, 217(3), 307–336. <https://doi.org/10.1002/cne.902170307>

Bennett, C., Gale, S. D., Garrett, M. E., Newton, M. L., Callaway, E. M., Murphy, G. J., & Olsen, S. R. (2019). Higher-Order Thalamic Circuits Channel Parallel Streams of Visual Information in Mice. *Neuron*, 1–16. <https://doi.org/10.1016/j.neuron.2019.02.010>

Bernstein, J. G., Garrity, P. A., & Boyden, E. S. (2012). Optogenetics and thermogenetics: technologies for controlling the activity of targeted cells within intact neural circuits. *Current Opinion in Neurobiology*, 22(1), 61–71. <https://doi.org/10.1016/j.conb.2011.10.023>

Bickford, M. E. (2015). Thalamic circuit diversity: Modulation of the driver/modulator framework. *Frontiers in Neural Circuits*, 9(JAN2016), 1–8. <https://doi.org/10.3389/fncir.2015.00086>

Bindels, D. S., Haarbosch, L., Van Weeren, L., Postma, M., Wiese, K. E., Mastop, M., Aumonier, S., Gotthard, G., Royant, A., Hink, M. A., & Gadella, T. W. J. (2016). mScarlet: A bright monomeric red fluorescent protein for cellular imaging. *Nature Methods*. <https://doi.org/10.1038/nmeth.4074>

Bruno, R. M., & Sakmann, B. (2006). Cortex is driven by weak but synchronously active thalamocortical synapses. *Science*, 312(5780), 1622–1627. <https://doi.org/10.1126/science.1124593>

Callaway, E. M., & Luo, L. (2015). Monosynaptic circuit tracing with glycoprotein-deleted rabies viruses. *Journal of Neuroscience*, 35(24), 8979–8985. <https://doi.org/10.1523/JNEUROSCI.0409-15.2015>

Ciabatti, E., González-Rueda, A., Mariotti, L., Morgese, F., & Tripodi, M. (2017). Life-Long Genetic and Functional Access to Neural Circuits Using Self-Inactivating Rabies Virus. *Cell*, 170(2), 382–392.e14. <https://doi.org/10.1016/j.cell.2017.06.014>

Clay Reid, R., & Alonso, J.-M. (1995). Specificity of monosynaptic connections from thalamus to visual cortex. *Nature*, 378(6554), 281–284. <https://doi.org/10.1038/378281a0>

Connolly, J. D., Hashemi-Nezhad, M., & Lyon, D. C. (2012). Parallel feedback pathways in visual cortex of cats revealed through a modified rabies virus. *Journal of Comparative Neurology*. <https://doi.org/10.1002/cne.22748>

Cowey, A., Smith, B., & Butter, C. M. (1984). Effects of damage to superior colliculi and pre-tectum on movement discrimination in rhesus monkeys. *Experimental Brain Research*, 56(1). <https://doi.org/10.1007/BF00237444>

Cruikshank, S. J., Lewis, T. J., & Connors, B. W. (2007). Synaptic basis for intense thalamocortical activation of feedforward inhibitory cells in neocortex. *Nature Neuroscience*, 10(4), 462–468. <https://doi.org/10.1038/nn1861>

Deisseroth, K. (2010). Optogenetics. *Nature Methods*, 8(1), 1–4. <https://doi.org/10.1038/NMETH.F.324>

Fabre-Thorpe, M., Viévard, A., & Buser, P. (1986). Role of the extra-geniculate pathway in visual guidance - II. Effects of lesioning the pulvinar-lateral posterior thalamic complex in the cat. *Experimental Brain Research*. <https://doi.org/10.1007/BF00236039>

Finke, S., Cox, J. H., & Conzelmann, K.-K. (2000). Differential Transcription Attenuation of Rabies Virus Genes by Intergenic Regions: Generation of Recombinant Viruses Overexpressing the Polymerase Gene. *Journal of Virology*, 74(16), 7261–7269. <https://doi.org/10.1128/jvi.74.16.7261-7269.2000>

Foik, A. T., Scholl, L. R., Lean, G. A., Aramant, R. B., McLelland, B. T., Seiler, M. J., Mathur, A., & Lyon, D. C. (2018). Detailed Visual Cortical Responses Generated by Retinal Sheet Transplants in Rats with Severe Retinal Degeneration. *The Journal of Neuroscience*, 38(50), 10709–10724. <https://doi.org/10.1523/jneurosci.1279-18.2018>

Ghanem, A., & Conzelmann, K. K. (2016). G gene-deficient single-round rabies viruses for neuronal circuit analysis. *Virus Research*, 216, 41–54. <https://doi.org/10.1016/j.virusres.2015.05.023>

Gil, Z., Connors, B. W., & Amitai, Y. (1999). Efficacy of Thalamocortical and Intracortical Synaptic Connections. *Neuron*, 23(2), 385–397. [https://doi.org/10.1016/S0896-6273\(00\)80788-6](https://doi.org/10.1016/S0896-6273(00)80788-6)

Govorunova, E. G., Sineshchekov, O. A., Janz, R., Liu, X., & Spudich, J. L. (2015). Natural light-gated anion channels: A family of microbial rhodopsins for advanced optogenetics. *Science*, 349(6248), 647–650. <https://doi.org/10.1126/science.aaa7484>

Han, X., & Boyden, E. S. (2007). Multiple-color optical activation, silencing, and desynchronization of neural activity, with single-spike temporal resolution. *PloS One*, 2(3), e299. <https://doi.org/10.1371/journal.pone.0000299>

- Juavinett, A. L., Kim, E. J., Collins, H. C., & Callaway, E. M. (2019). A systematic topographical relationship between mouse lateral posterior thalamic neurons and their visual cortical projection targets. *Journal of Comparative Neurology*, July, cne.24737. <https://doi.org/10.1002/cne.24737>
- Kaas, J. H., & Lyon, D. C. (2007). Pulvinar contributions to the dorsal and ventral streams of visual processing in primates. *Brain Research Reviews*, 55(2 SPEC. ISS.), 285–296. <https://doi.org/10.1016/j.brainresrev.2007.02.008>
- Kamishina, H., Conte, W. L., Patel, S. S., Tai, R. J., Corwin, J. V., & Reep, R. L. (2009). Cortical connections of the rat lateral posterior thalamic nucleus. *Brain Research*, 1264, 39–56. <https://doi.org/10.1016/j.brainres.2009.01.024>
- Katzner, S., Nauhaus, I., Benucci, A., Bonin, V., Ringach, D. L., & Carandini, M. (2009). Local Origin of Field Potentials in Visual Cortex. *Neuron*, 61(1), 35–41. <https://doi.org/10.1016/j.neuron.2008.11.016>
- Kim, E. J., Jacobs, M. W., Ito-Cole, T., & Callaway, E. M. (2016). Improved Monosynaptic Neural Circuit Tracing Using Engineered Rabies Virus Glycoproteins. *Cell Reports*. <https://doi.org/10.1016/j.celrep.2016.03.067>
- Kim, E. J., Juavinett, A. L., Kyubwa, E. M., Jacobs, M. W., & Callaway, E. M. (2015). Three Types of Cortical Layer 5 Neurons That Differ in Brain-wide Connectivity and Function. *Neuron*. <https://doi.org/10.1016/j.neuron.2015.11.002>
- Klapoetke, N. C., Murata, Y., Kim, S. S., Pulver, S. R., Birdsey-Benson, A., Cho, Y. K., Morimoto, T. K., Chuong, A. S., Carpenter, E. J., Tian, Z., Wang, J., Xie, Y., Yan, Z., Zhang, Y., Chow, B. Y., Surek, B., Melkonian, M., Jayaraman, V., Constantine-Paton, M., ... Boyden, E. S. (2014). Independent optical excitation of distinct neural populations. *Nature Methods*, 11(3), 338–346. <https://doi.org/10.1038/nmeth.2836>
- Lean, G. A., Liu, Y.-J., & Lyon, D. C. (2019). Cell type specific tracing of the subcortical input to primary visual cortex from the basal forebrain. *Journal of Comparative Neurology*, 527(3), 589–599. <https://doi.org/10.1002/cne.24412>
- Lee, S. H., Kwan, A. C., Zhang, S., Phoumthippavong, V., Flannery, J. G., Masmanidis, S. C., Taniguchi, H., Huang, Z. J., Zhang, F., Boyden, E. S., Deisseroth, K., & Dan, Y. (2012). Activation of specific interneurons improves V1 feature selectivity and visual perception. *Nature*. <https://doi.org/10.1038/nature11312>
- Lignani, G., Ferrea, E., Difato, F., Amarù, J., Ferroni, E., Lugarà, E., Espinoza, S., Gainetdinov, R. R., Baldelli, P., & Benfenati, F. (2013). Long-term optical stimulation of channelrhodopsin-expressing neurons to study network plasticity. *Frontiers in Molecular Neuroscience*, 6(August), 1–9. <https://doi.org/10.3389/fnmol.2013.00022>
- Lim, S. T., Antonucci, D. E., Scannevin, R. H., & Trimmer, J. S. (2000). A novel targeting signal for proximal clustering of the Kv2.1 K<sup>+</sup> channel in hippocampal neurons. *Neuron*, 25(2), 385–397. [https://doi.org/10.1016/S0896-6273\(00\)80902-2](https://doi.org/10.1016/S0896-6273(00)80902-2)



Liu, Y. J., Ehrenguber, M. U., Negwer, M., Shao, H. J., Cetin, A. H., & Lyon, D. C. (2013). Tracing inputs to inhibitory or excitatory neurons of mouse and cat visual cortex with a targeted rabies virus. *Current Biology*, 23(18), 1746–1755. <https://doi.org/10.1016/j.cub.2013.07.033>

Lomber, S. G. (1999). The advantages and limitations of permanent or reversible deactivation techniques in the assessment of neural function. *Journal of Neuroscience Methods*, 86(2), 109–117. [https://doi.org/10.1016/S0165-0270\(98\)00160-5](https://doi.org/10.1016/S0165-0270(98)00160-5)

Lyon, D. C., Jain, N., & Kaas, J. H. (2003). The visual pulvinar in tree shrews II. Projections of four nuclei to areas of visual cortex. *The Journal of Comparative Neurology*, 467(4), 607–627. <https://doi.org/10.1002/cne.10940>

Mahn, M., Gibor, L., Patil, P., Cohen-Kashi Malina, K., Oring, S., Printz, Y., Levy, R., Lampl, I., & Yizhar, O. (2018). High-efficiency optogenetic silencing with soma-targeted anion-conducting channelrhodopsins. *Nature Communications*, 9(1). <https://doi.org/10.1038/s41467-018-06511-8>

Majchrzak, M., & Di Scala, G. (2000). GABA and muscimol as reversible inactivation tools in learning and memory. *Neural Plasticity*, 7(1–2), 19–29. <https://doi.org/10.1155/NP.2000.19>

Marshel, J. H., Mori, T., Nielsen, K. J., & Callaway, E. M. (2010). Targeting single neuronal networks for gene expression and cell labeling in vivo. *Neuron*. <https://doi.org/10.1016/j.neuron.2010.08.001>

Miyamichi, K., Amat, F., Moussavi, F., Wang, C., Wickersham, I., Wall, N. R., Taniguchi, H., Tasic, B., Huang, Z. J., He, Z., Callaway, E. M., Horowitz, M. A., & Luo, L. (2011). Cortical representations of olfactory input by trans-synaptic tracing. *Nature*. <https://doi.org/10.1038/nature09714>

Nakamura, H., Hioki, H., Furuta, T., & Kaneko, T. (2015). Different cortical projections from three subdivisions of the rat lateral posterior thalamic nucleus: A single-neuron tracing study with viral vectors. *European Journal of Neuroscience*, 41(10), 1294–1310. <https://doi.org/10.1111/ejn.12882>

Nathanson, J. L., Jappelli, R., Scheeff, E. D., Manning, G., Obata, K., Brenner, S., & Callaway, E. M. (2009). Short promoters in viral vectors drive selective expression in mammalian inhibitory neurons, but do not restrict activity to specific inhibitory cell-types. *Frontiers in Neural Circuits*. <https://doi.org/10.3389/neuro.04.019.2009>

Negwer, M., Liu, Y. J., Schubert, D., & Lyon, D. C. (2017). V1 connections reveal a series of elongated higher visual areas in the California ground squirrel, *Otospermophilus beecheyi*. *Journal of Comparative Neurology*. <https://doi.org/10.1002/cne.24173>

Nishio, N., Tsukano, H., Hishida, R., Abe, M., Nakai, J., Kawamura, M., Aiba, A., Sakimura, K., & Shibuki, K. (2018). Higher visual responses in the temporal cortex of mice. *Scientific Reports*, 8(1), 1–12. <https://doi.org/10.1038/s41598-018-29530-3>

Oda, K., Vierock, J., Oishi, S., Rodriguez-Rozada, S., Taniguchi, R., Yamashita, K., Wiegert, J. S., Nishizawa, T., Hegemann, P., & Nureki, O. (2018). Crystal structure of the red light-activated channelrhodopsin Chrimson. *Nature Communications*, 9(1), 1–11. <https://doi.org/10.1111/j.1432-1033.1978.tb12773.x>

Olsen, S. R., Bortone, D. S., Adesnik, H., & Scanziani, M. (2012). Gain control by layer six in cortical circuits of vision. *Nature*. <https://doi.org/10.1038/nature10835>

Osakada, F., & Callaway, E. E. M. (2013). Design and generation of recombinant rabies virus vectors. *Nature Protocols*, 8(8), 1583–1601. <https://doi.org/10.1038/nprot.2013.094>

Osakada, F., Mori, T., Cetin, A. H. A., Marshel, J. H. J., Virgen, B., & Callaway, E. M. (2011). New rabies virus variants for monitoring and manipulating activity and gene expression in defined neural circuits. *Neuron*, 71(4), 617–631. <https://doi.org/10.1016/j.neuron.2011.07.005>

Partlow, G. D., Colonnier, M., & Szabo, J. (1977). Thalamic projections of the superior colliculus in the rhesus monkey, *Macaca mulatta*. A light and electron microscopic study. *The Journal of Comparative Neurology*, 171(3), 285–317. <https://doi.org/10.1002/cne.901710302>

Pasquier, D. A., & Villar, M. J. (1982). Subcortical projections to the lateral geniculate body in the rat. *Experimental Brain Research*, 48(3), 409–419. <https://doi.org/10.1007/BF00238617>

Paxinos, G., & Watson, C. (2013). *The rat brain in stereotaxic coordinates*. London: Academic Press.

Prigge, M., Schneider, F., Tsunoda, S. P., Shilyansky, C., Wietek, J., Deisseroth, K., & Hegemann, P. (2012). Color-tuned channelrhodopsins for multiwavelength optogenetics. *Journal of Biological Chemistry*, 287(38), 31804–31812. <https://doi.org/10.1074/jbc.M112.391185>

Pula, J. H., & Yuen, C. A. (2017). Eyes and stroke: The visual aspects of cerebrovascular disease. In *Stroke and Vascular Neurology*. <https://doi.org/10.1136/svn-2017-000079>

Purushothaman, G., Marion, R., Li, K., & Casagrande, V. a. (2012). Gating and control of primary visual cortex by pulvina. *Nature Neuroscience*, 15(6), 905–912. <https://doi.org/10.1038/nn.3106>

Purves, D., Augustine, G., Fitzpatrick, D., Katz, L., LaMantia, A.-S., McNamara, J., & Williams, M. (2001). *Visual Field Deficits*. In *Neuroscience* (2nd ed.). Sunderland (MA): Sinauer Associates.

Rancz, E. A., Franks, K. M., Schwarz, M. K., Pichler, B., Schaefer, A. T., & Margrie, T. W. (2011). Transfection via whole-cell recording in vivo: Bridging single-cell physiology, genetics and connectomics. *Nature Neuroscience*. <https://doi.org/10.1038/nn.2765>

Romanski, L. M., Giguere, M., Bates, J. F., & Goldman-Rakic, P. S. (1997). Topographic organization of medial pulvinar connections with the prefrontal cortex in the rhesus monkey. *Journal of Comparative Neurology*, 379(3), 313–332. [https://doi.org/10.1002/\(SICI\)1096-9861\(19970317\)379:3<313::AID-CNE1>3.0.CO;2-6](https://doi.org/10.1002/(SICI)1096-9861(19970317)379:3<313::AID-CNE1>3.0.CO;2-6)

Roth, M. M., Dahmen, J. C., Muir, D. R., Imhof, F., Martini, F. J., & Hofer, S. B. (2016). Thalamic nuclei convey diverse contextual information to layer 1 of visual cortex. *Nature Neuroscience*, 19(2), 299–307. <https://doi.org/10.1038/nn.4197>

Saalmann, Y. B., Pinsk, M. a., Wang, L., Li, X., & Kastner, S. (2012). The Pulvinar Regulates Information Transmission Between Cortical Areas Based on Attention Demands. *Science*, 337(6095), 753–756. <https://doi.org/10.1126/science.1223082>

Schnell, M. J., McGettigan, J. P., Wirblich, C., & Papaneri, A. (2010). The cell biology of rabies virus: Using stealth to reach the brain. *Nature Reviews Microbiology*, 8(1), 51–61. <https://doi.org/10.1038/nrmicro2260>

Sherman, S. M., & Guillery, R. W. (1998). On the actions that one nerve cell can have on another: Distinguishing “drivers” from “modulators.” *Proceedings of the National Academy of Sciences of the United States of America*, 95(12), 7121–7126. <https://doi.org/10.1073/pnas.95.12.7121>

Sheth, B. R., & Young, R. (2016). Two visual pathways in primates based on sampling of space: Exploitation and exploration of visual information. *Frontiers in Integrative Neuroscience*, 10(NOV2016). <https://doi.org/10.3389/fnint.2016.00037>

Snow, J. C., Allen, H. A., Rafal, R. D., & Humphreys, G. W. (2009). Impaired attentional selection following lesions to human pulvinar: Evidence for homology between human and monkey. *Proceedings of the National Academy of Sciences of the United States of America*, 106(10), 4054–4059. <https://doi.org/10.1073/pnas.0810086106>

Sprague, J. M., & Meikle, T. H. (1965). The role of the superior colliculus in visually guided behavior. *Experimental Neurology*, 11(1), 115–146. [https://doi.org/10.1016/0014-4886\(65\)90026-9](https://doi.org/10.1016/0014-4886(65)90026-9)

Takahashi, T. (1985). The organization of the lateral thalamus of the hooded rat. *The Journal of Comparative Neurology*, 231(3), 281–309. <https://doi.org/10.1002/cne.902310302>

Tohmi, M., Meguro, R., Tsukano, H., Hishida, R., & Shibuki, K. (2014). The extrageniculate visual pathway generates distinct response properties in the higher visual areas of mice. *Current Biology : CB*, 24(6), 587–597. <https://doi.org/10.1016/j.cub.2014.01.061>

Van Vreeswijk, C., & Sompolinsky, H. (1996). Chaos in neuronal networks with balanced excitatory and inhibitory activity. *Science*. <https://doi.org/10.1126/science.274.5293.1724>

Vermaercke, B., Gerich, F. J., Ytebrouck, E., Arckens, L., Op de Beeck, H. P., & Van den Bergh, G. (2014). Functional specialization in rat occipital and temporal visual cortex. *Journal of Neurophysiology*, 112(8), 1963–1983. <https://doi.org/10.1152/jn.00737.2013>

Wall, N. R., de la Parra, M., Sorokin, J. M., Taniguchi, H., Huang, Z. J., & Callaway, E. M. (2016). Brain-wide maps of synaptic input to cortical interneurons. *Journal of Neuroscience*. <https://doi.org/10.1523/JNEUROSCI.3967-15.2016>

Wall, N. R., Wickersham, I. R., Cetin, A., De La Parra, M., & Callaway, E. M. (2010). Monosynaptic circuit tracing in vivo through Cre-dependent targeting and complementation of modified rabies virus. *Proceedings of the National Academy of Sciences of the United States of America*. <https://doi.org/10.1073/pnas.1011756107>

Wertz, A., Trenholm, S., Yonehara, K., Hillier, D., Raics, Z., Leinweber, M., Szalay, G., Ghanem, A., Keller, G., Rózsa, B., Conzelmann, K. K., & Roska, B. (2015). Single-cell-initiated monosynaptic tracing reveals layer-specific cortical network modules. *Science*. <https://doi.org/10.1126/science.aab1687>

Wickersham, I. R. I., Finke, S., Conzelmann, K. K., & Callaway, E. M. (2006). Retrograde neuronal tracing with a deletion-mutant rabies virus. *Nature ...*, 4(1), 47–49. <https://doi.org/10.1038/nmeth999>

Wickersham, I. R. I., Lyon, D. C. D., Barnard, R. J. O. R., Mori, T., Finke, S., Conzelmann, K. K., Young, J. A. T., & Callaway, E. M. (2007). Monosynaptic restriction of transsynaptic tracing from single, genetically targeted neurons. *Neuron*, 53(5), 639–647. <https://doi.org/10.1016/j.neuron.2007.01.033>

Wilke, M., Mueller, K.-M., & Leopold, D. A. (2009). Neural activity in the visual thalamus reflects perceptual suppression. *Proceedings of the National Academy of Sciences*, 106(23), 9465–9470. <https://doi.org/10.1073/pnas.0900714106>

Wilson, N. R., Runyan, C. A., Wang, F. L., & Sur, M. (2012). Division and subtraction by distinct cortical inhibitory networks in vivo. *Nature*. <https://doi.org/10.1038/nature11347>

Xue, M., Atallah, B. V., & Scanziani, M. (2014). Equalizing excitation-inhibition ratios across visual cortical neurons. *Nature*. <https://doi.org/10.1038/nature13321>

Yizhar, O., Fenno, L. E., Prigge, M., Schneider, F., Davidson, T. J., Ogshea, D. J., Sohal, V. S., Goshen, I., Finkelstein, J., Paz, J. T., Stehfest, K., Fudim, R., Ramakrishnan, C., Huguenard, J. R., Hegemann, P., & Deisseroth, K. (2011). Neocortical excitation/inhibition balance in information processing and social dysfunction. *Nature*, 477(7363), 171–178. <https://doi.org/10.1038/nature10360>

Zhang, F., Wang, L.-P. P., Brauner, M., Liewald, J. F., Kay, K., Watzke, N., Wood, P. G., Bamberg, E., Nagel, G., Gottschalk, A., & Deisseroth, K. (2007). Multimodal fast optical interrogation of neural circuitry. *Nature*, 446(7136), 633–639. <https://doi.org/10.1038/nature05744>

Zhou, H., Schafer, R. J., & Desimone, R. (2016). Pulvinar-Cortex Interactions in Vision and Attention. *Neuron*, 89(1), 209–220. <https://doi.org/10.1016/j.neuron.2015.11.034>

Zhou, N., Masterson, S., Damron, J., Guido, W., & Bickford, M. (2017). The mouse pulvinar nucleus links the lateral extrastriate cortex, striatum, and amygdala. *The Journal of Neuroscience*, 1279–17. <https://doi.org/10.1523/JNEUROSCI.1279-17.2017>
